# Supplementary material for: Developing a taxonomy of care coordination for people living with rare conditions: a qualitative study
Source: Springer Nature journal article supplement (doi:10.1186/s13023-022-02321-w), 2022-04-20
Supplement: MOESM3 [file 20327278]

# CONCORD WORKSHOP

## PATIENT & CARERS

### FEEDBACK ON DIFFERENT WAYS OF CO-ORDINATING CARE FOR RARE CONDITIONS

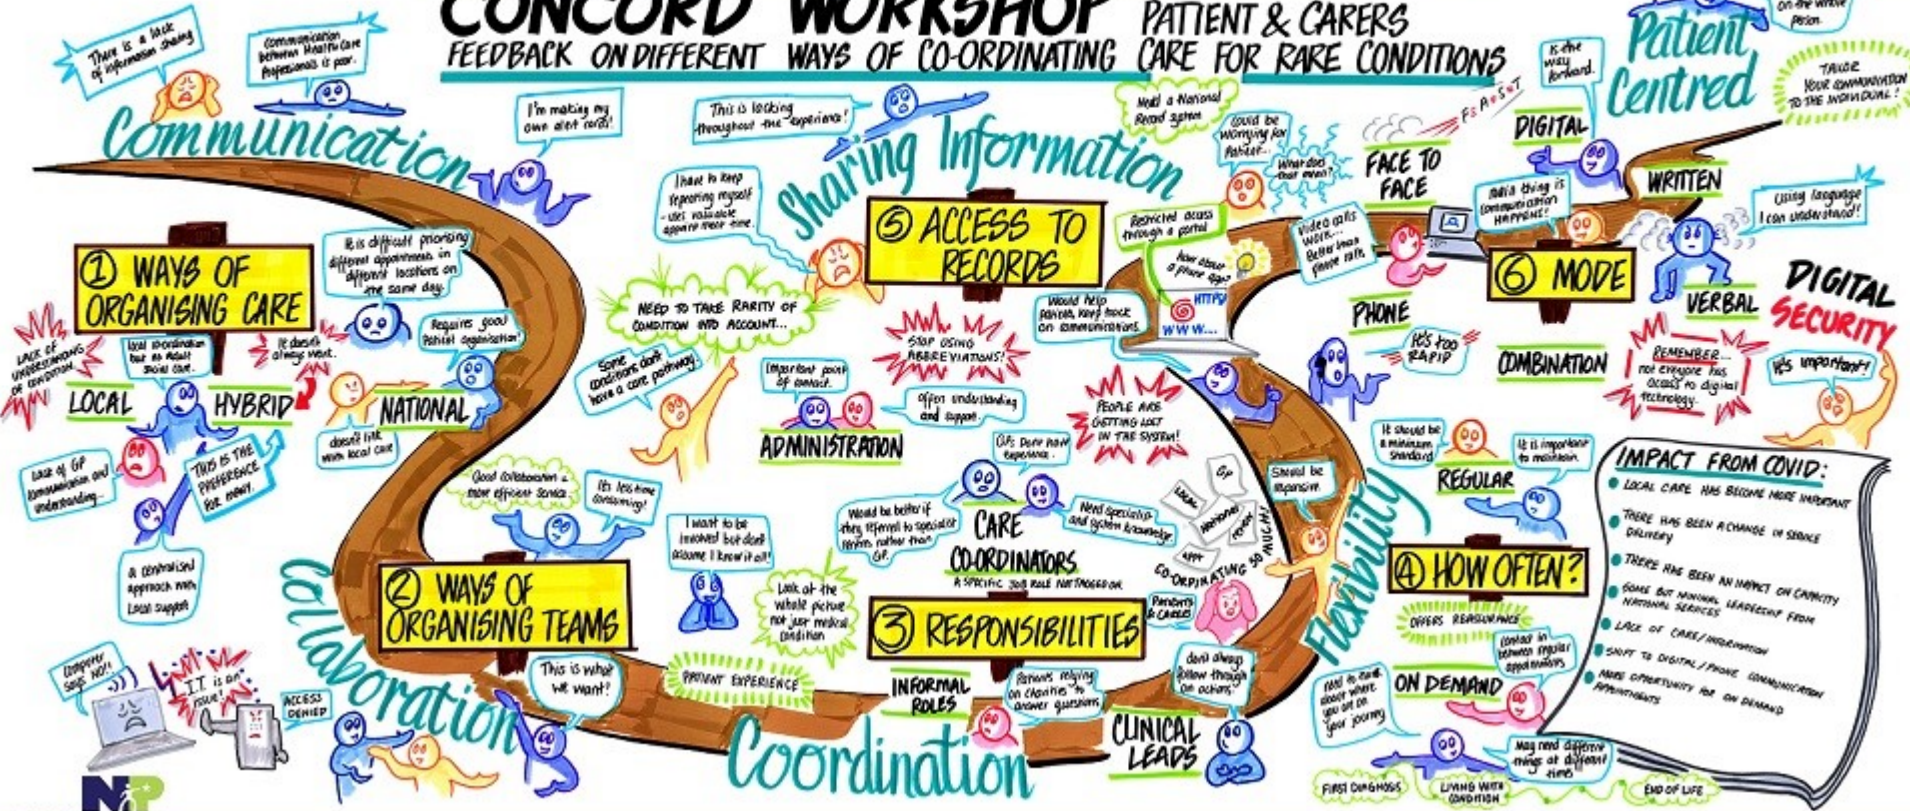



**CONCORD WORKSHOP HEALTHCARE PROFESSIONALS  
CHARITY REPS & COMMISSIONERS: FEEDBACK ON CO-ORDINATING CARE FOR RARE CONDITIONS**

**① WAYS OF ORGANISING CARE**

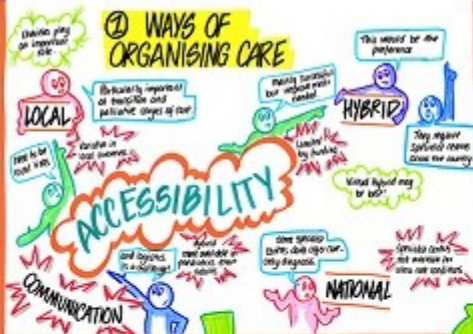

**② WAYS OF ORGANISING TEAMS**

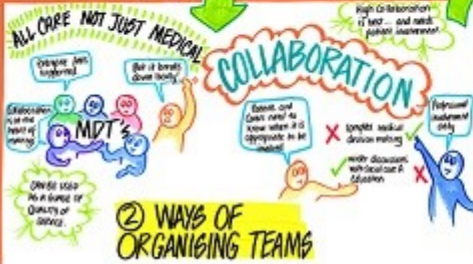

**③ RESPONSIBILITIES**

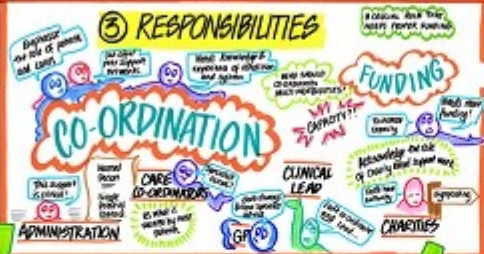

**④ HOW OFTEN**

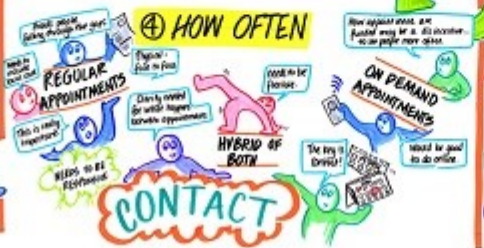

**⑤ ACCESS TO RECORDS**

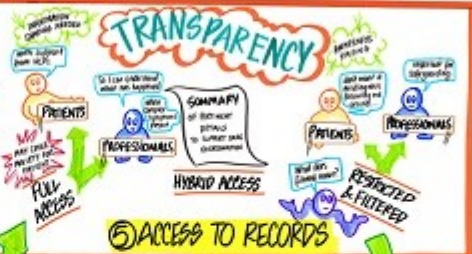

**⑥ MODE**

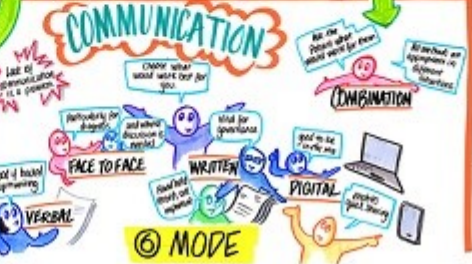

- IMPACT OF COVID
- ▲ SHIFT TO DIGITAL / PHONE
- ▲ CHANGE TO SERVICE DELIVERY
- ▲ LEADERSHIP FROM NATIONAL SERVICES
- ▲ INCREASED OPPORTUNITIES FOR COLLABORATION
- ▲ REDUCED ACCESS TO SPECIALISTS
- ▲ IMPACT ON CAPACITY
- ▲ LACK OF CARE / INFORMATION
- ▲ MORE OPPORTUNITY FOR ON DEMAND APPOINTMENTS
- ▲ MORE OPPORTUNITY FOR FLEXIBLE MODES OF COMMUNICATION
